# Supplementary material for: Self-tuned properties of CuZnO catalysts for hydroxymethylfurfural hydrodeoxygenation towards dimethylfuran production
Source: Royal Society of Chemistry journal article supplement (doi:10.1039/c9cy01917k), 2019-12-05
Supplement: c9cy01917k1.pdf [file c9cy01917k1.pdf]

## Electronic Supplementary Information to :

### Self-tuned properties of Cu-ZnO catalysts for hydroxymethylfurfural hydrodeoxygenation towards DMF production

Magdalena Brzezinska<sup>a,b</sup>, Nicolas Keller<sup>b</sup> and Agnieszka M. Ruppert<sup>\*a</sup>

<sup>a.</sup> *Institute of General and Ecological Chemistry, Faculty of Chemistry, Łódź University of Technology, ul. Żeromskiego 116, 90-924 Łódź, Poland.  
e-mail: agnieszka.ruppert@p.lodz.pl; Fax: +48426313128; Tel: +48426313106*

<sup>b.</sup> *Institut de Chimie et Procédés pour l'Energie, l'Environnement et la Santé, ICPEES, CNRS, University of Strasbourg, 25 rue Becquerel, 67087 Strasbourg, France*

**Table S1.** ZnO cell parameters obtained by Rietvelt refinement of X-ray diffractograms of CuZnO(I) and CuZnO(P) catalysts during the test cycling procedure.

| Sample             | Cell parameter a [Å] | Cell parameter c [Å] |
|--------------------|----------------------|----------------------|
| ZnO                | 3.249(1)             | 5.203(1)             |
| CuZnO(I)           | 3.249(1)             | 5.204(1)             |
| CuZnO(I)-used      | 3.248(1)             | 5.205(1)             |
| CuZnO(I)-used-(ox) | 3.249(1)             | 5.205(1)             |
| CuZnO(P)           | 3.248(1)             | 5.206(1)             |
| CuZnO(P)-used      | 3.249(1)             | 5.205(1)             |
| CuZnO(P)-used-(ox) | 3.249(1)             | 5.205(1)             |

**Table S2.** Mean particle size of the Cu phase in the CuZnO(I) catalyst during the test cycling procedure (tests 1 to 5).

| Sample                                                                          | Phase | Mean particle size [nm] |
|---------------------------------------------------------------------------------|-------|-------------------------|
| CuZnO(I)                                                                        | CuO   | 21                      |
| CuZnO(I)-used ( <i>ie.</i> used after 1 <sup>st</sup> test)                     | Cu    | 28                      |
| CuZnO(I)-used-(ox) ( <i>ie.</i> used after 1 <sup>st</sup> test and reoxidized) | CuO   | 11                      |
| Used after 2 <sup>nd</sup> test                                                 | Cu    | 32                      |
| Used after 2 <sup>nd</sup> test and reoxidized                                  | CuO   | 12                      |
| Used after 3 <sup>rd</sup> test                                                 | Cu    | 23                      |
| Used after 3 <sup>rd</sup> test and reoxidized                                  | CuO   | 12                      |
| Used after 4 <sup>th</sup> test                                                 | Cu    | 27                      |
| Used after 4 <sup>th</sup> test and reoxidized                                  | CuO   | 12                      |
| Used after 5 <sup>th</sup> test                                                 | Cu    | 28                      |

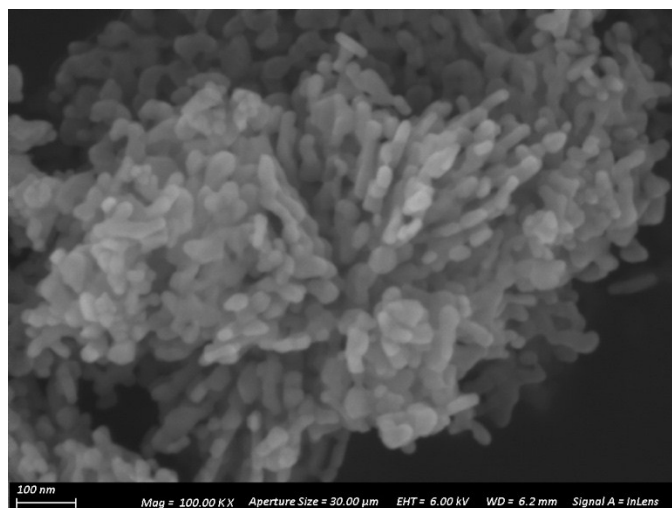

**Figure S1.** SEM image of the bare ZnO support.

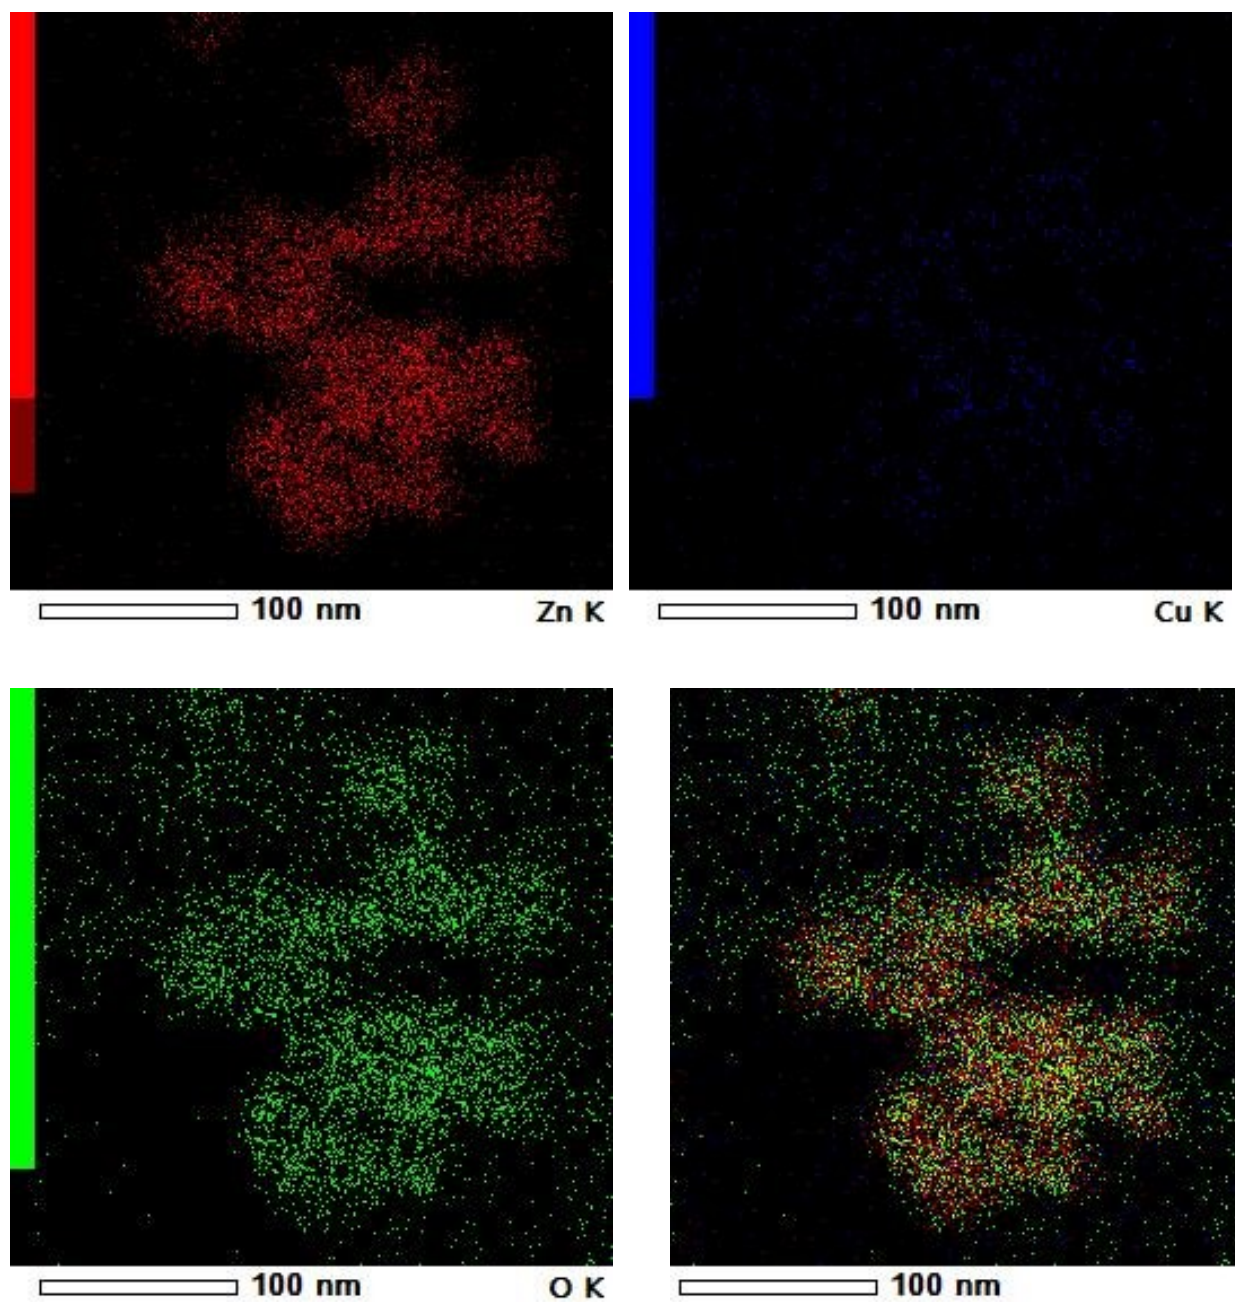

**Figure S2.** Mapping scanning transmission electron microscopy (STEM) imaging recorded on the CuZnO(P) catalyst prepared *via* the photo-assisted way : (red) Zn K, (blue) Cu K, (green) O K and (overlay).

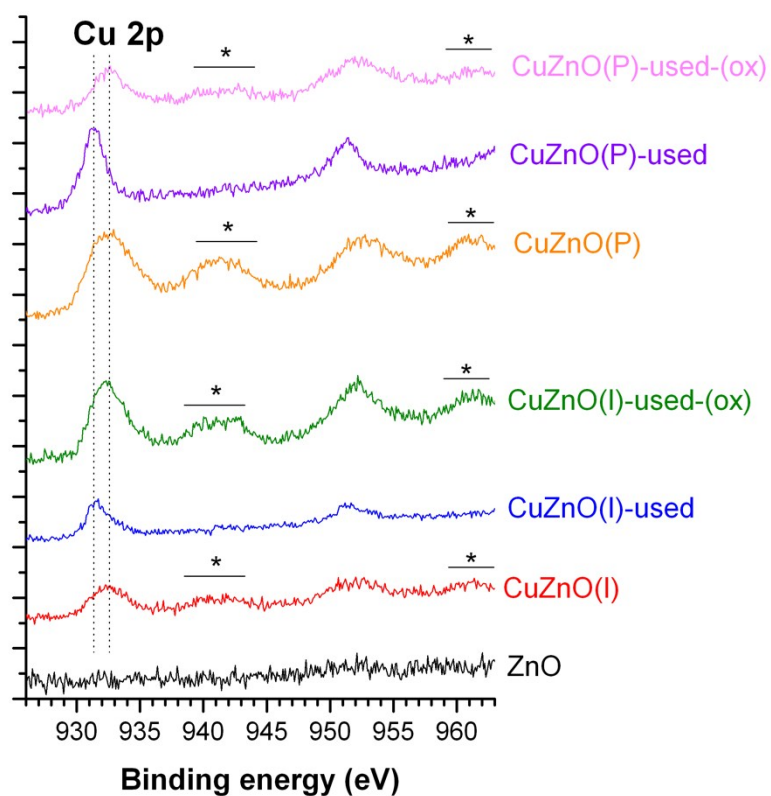

**Figure S3.** Influence of the CuZnO catalyst preparation method and of the treatment applied (fresh, used and used catalyst after reoxidation step) on the Cu 2p<sub>3/2</sub> and 2p<sub>1/2</sub> orbital region of the XPS spectra recorded for both series of catalysts. (\*) corresponds to Cu<sup>2+</sup> satellites.
